# Supplementary material for: Lightweight comparison of RNAs based on exact sequence–structure matches
Source: PubMed Central journal article supplement — Bioinformatics. 2009 Feb 2;25(16):2095–102. doi: 10.1093/bioinformatics/btp065 (PMC2722993; doi:10.1093/bioinformatics/btp065), 2009-02-02
Supplement: btp065_1.pdf [file btp065_1.pdf]

## SUPPLEMENTARY DATA:

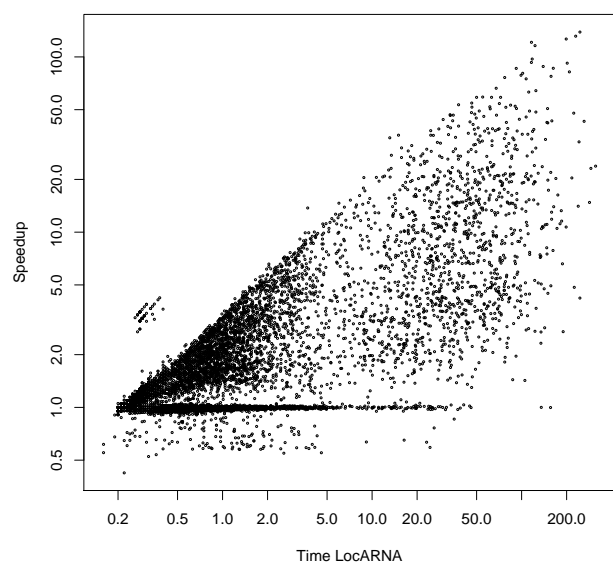

**Figure 1.** Log-log scatterplot of LocARNA runtimes (x-axis) versus obtained speedup of ExpLoc with  $\gamma = 10$ .

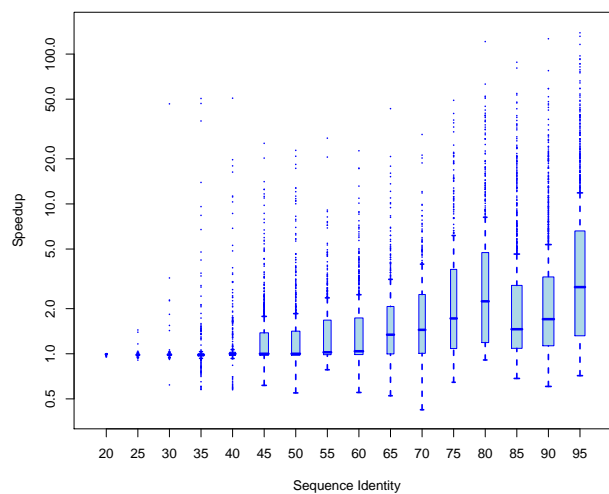

**Figure 2.** Distribution of obtained speedup for ExpLoc on log-scale on Bralibase 2.1 k2 dataset with  $\gamma = 10$  for different sequence identity values. For distribution computation, alignments were grouped according to their sequence identity in intervals of width 5.
